# Supplementary material for: Comparison of different MRI-based morphometric estimates for defining neurodegeneration across the Alzheimer's disease continuum
Source: PubMed Central journal article supplement — Neuroimage Clin. 2019 Jun 10;23:101895. doi: 10.1016/j.nicl.2019.101895 (PMC6599872; doi:10.1016/j.nicl.2019.101895), 2019-06-10

**Supplemental Figure 2A: Age-Adjusted Boxplots by Stage for NFL**

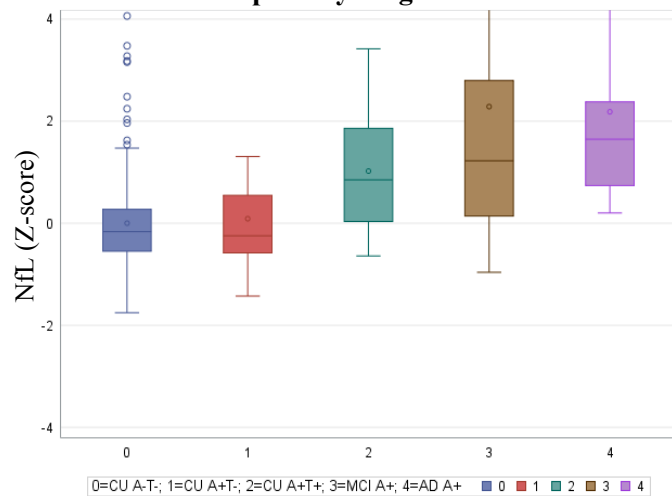

**Supplemental Figure 2B: Age-Adjusted Boxplots by Stage for AD Signature**

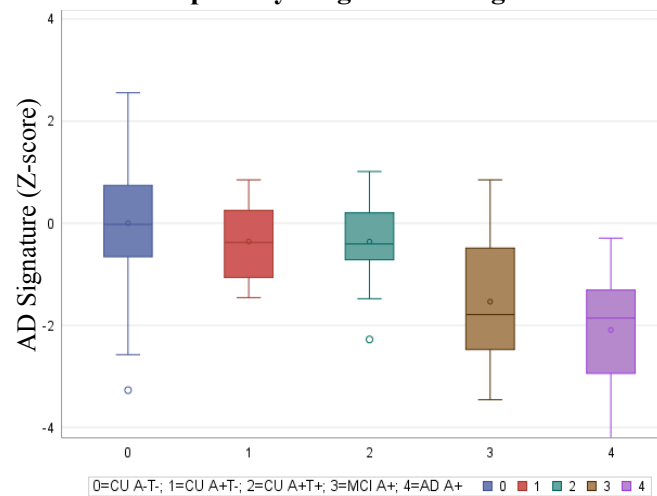

**Supplemental Figure 2C: Age-Adjusted Boxplots by Stage for Hippocampal Volume**

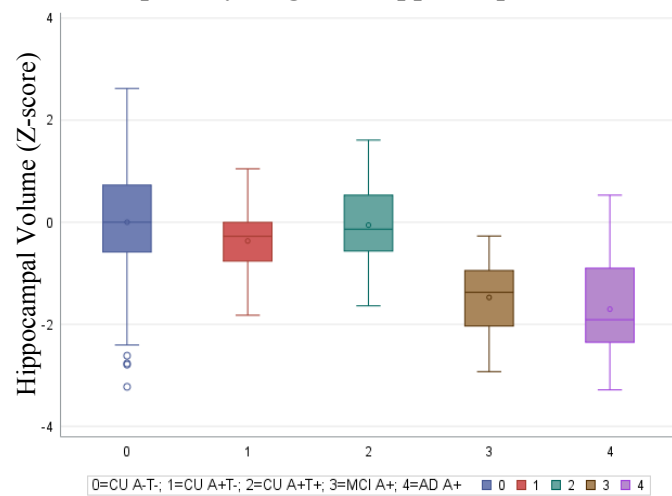

**Supplemental Figure 2D: Age-Adjusted Boxplots by Stage for Global Atrophy**

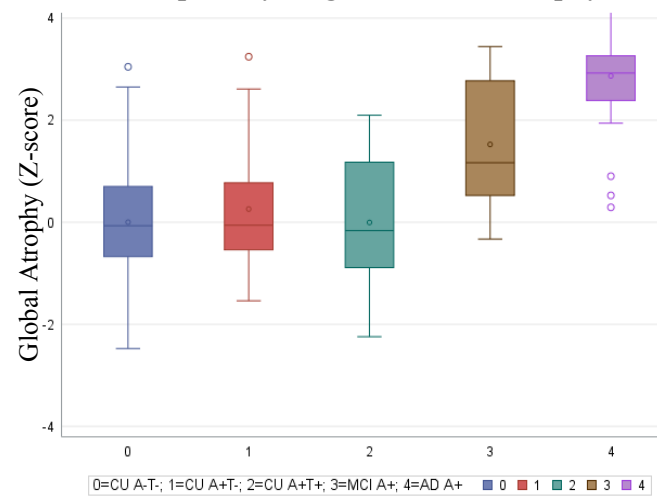

Supplement: mmc2.pdf [file mmc2.pdf]
