# Supplementary figures and images for: Comparison of different MRI-based morphometric estimates for defining neurodegeneration across the Alzheimer's disease continuum
Source: PubMed Central journal article supplement — Neuroimage Clin. 2019 Jun 10;23:101895. doi: 10.1016/j.nicl.2019.101895 (PMC6599872; doi:10.1016/j.nicl.2019.101895), 2019-06-10

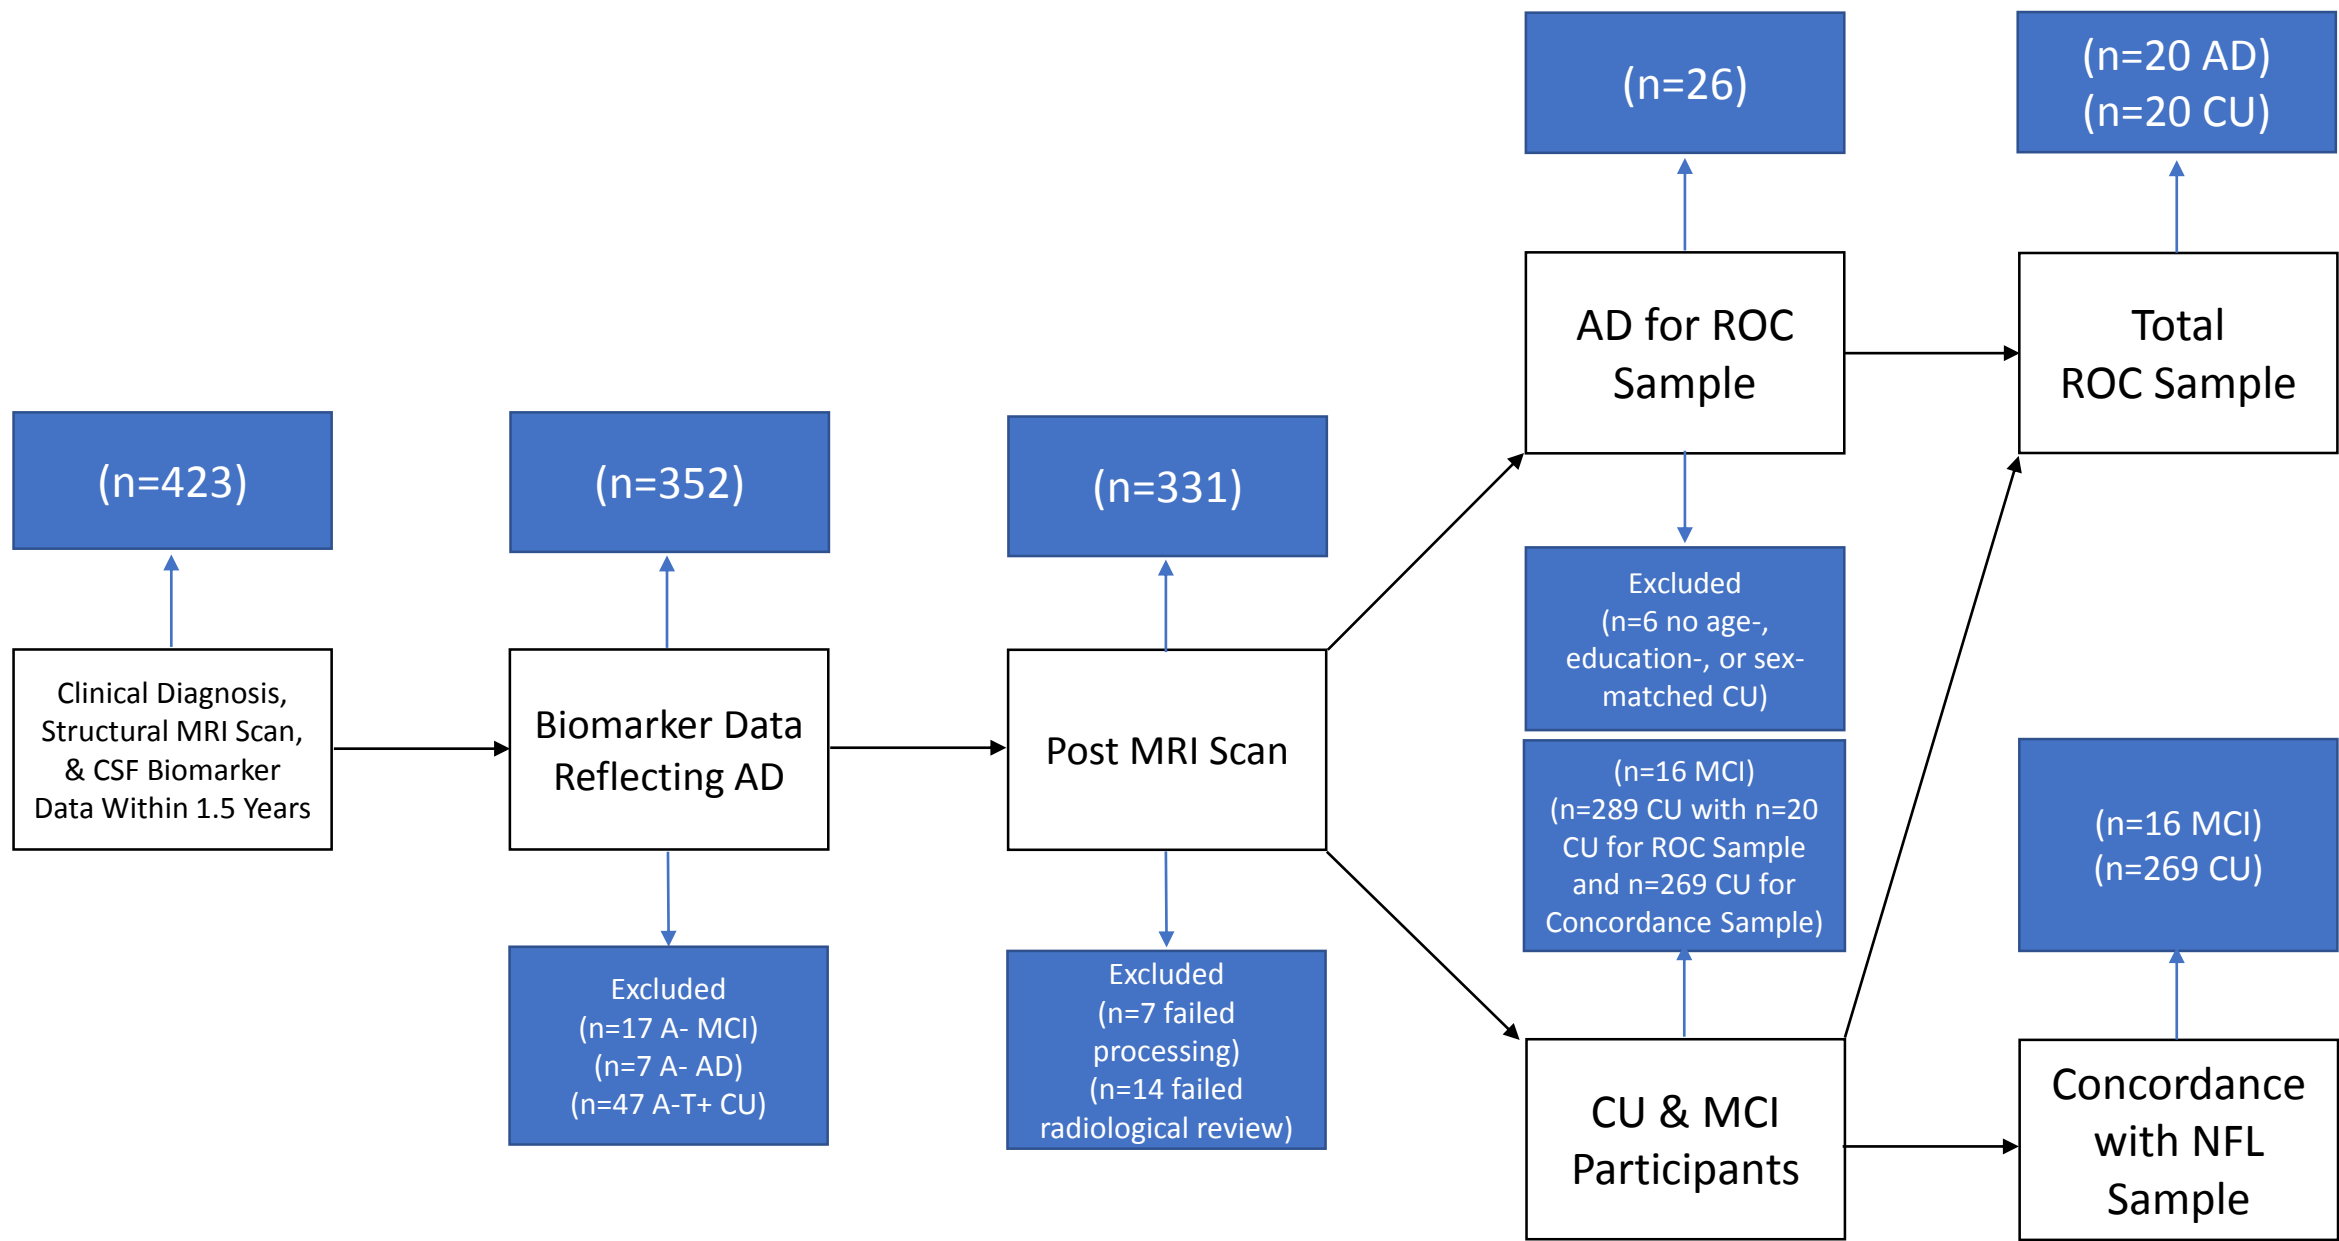

Supplement: mmc1.pdf [file mmc1.pdf]
